# Supplementary material for: Systems Pharmacology-Based Strategy to Investigate Pharmacological Mechanisms of Radix Puerariae for Treatment of Hypertension
Source: Front Pharmacol. 2020 Mar 24;11:345. doi: 10.3389/fphar.2020.00345 (PMC7107014; doi:10.3389/fphar.2020.00345)
Supplement: Supplementary file 3 [file Table_3.xls]

## Sheet: Sheet1
Table S3: The 140 Overlapping gene symbols between disease and drug
Gene Symbol	Evidence or reference
NOS2	Functional Inducible Nitric Oxide Synthase Gene Variants Associate With Hypertension: A Case-Control Study in a Finnish Population-The TAMRISK Study. (PMID: 26579803)
PTGS1	Association of candidate gene polymorphisms with chronic kidney disease in Japanese individuals with hypertension. (PMID: 19282863)
CHRM1	Endothelium-derived relaxing and contracting factors. (PMID: 1874796)
ESR1	Genetic analysis of 22 candidate genes for hypertension in the Japanese population. (PMID: 15167446)
AR	The polymorphic CAG repeat in exon 1 of androgen receptor is associated with level of HDL cholesterol and hypertension in Chinese middle-aged and elderly men. (PMID: 28295444)
PPARG	Interactions Between PPARG and AGTR1 Gene Polymorphisms on the Risk of Hypertension in Chinese Han Population. (PMID: 29266977)
PTGS2	Endothelial dysfunction in small arteries of essential hypertensive patients: role of cyclooxygenase-2 in oxidative stress generation. (PMID: 23734008)
RXRA	Correlation of Peroxisome Proliferator-Activated Receptor-gamma (PPAR-gamma) and Retinoid X Receptor-alpha (RXR-alpha) expression with clinical risk factors in patients with advanced carotid atherosclerosis. (PMID: 21709632)
ADRA1A	Association of alpha1A adrenergic receptor gene variants on chromosome 8p21 with human stage 2 hypertension. (PMID: 16685204)
SLC6A3	Characterization of VNTRs Within the Entire Region of SLC6A3 and Its Association with Hypertension. (PMID: 28055236)
ADRB2	Functional variant in the (alpha)2B adrenoceptor gene...positional candidate on chromosome 2, associates with hypertension. (PMID: 14744925)
SLC6A4	Population differences in associations of serotonin...and triallelic genotypes with blood pressure and hypertension prevalence. (PMID: 28267464)
ESR2	Estrogen receptor beta genetic variants and combined...oral contraceptive use as relates to the risk of hypertension in Chinese women. (PMID: 21199728)
MAPK14	Induction of mitogen-activated protein kinases is proportional to the amount of pressure overload. (PMID: 19901160)
GSK3B	GSK3beta: role in therapeutic landscape and development of modulators. (PMID: 20331603)
MAOB	[Study on molecular mechanism of ganyang shangkang syndrome in hypertension]. (PMID: 11783321)
CCNA2	Bardet-Biedl Syndrome Gene-disease relationship from GeneCards Symptoms: hypertension
PKIA	Function：GWAS Catalog phenotypes. hypertension
ACHE	Racial/ethnic disparities in medication use among veterans with hypertension and dementia: a national cohort study. (PMID: 19193586)
JUN	Interaction among heme oxygenase, nuclear factor-kappaB...transcription activating factors in cardiac hypertrophy in hypertension. (PMID: 18824663)
IL4	A preliminary study of the relation between IL-4 and hypertension in type II diabetes mellitus. (PMID: 30182172)
ATP5F1B	Intracellular signaling for vasoconstrictor coupling factor 6: novel function of beta-subunit of ATP synthase as receptor. (PMID: 16230521)
HSD3B2	Association of HSD3B1 and HSD3B2 gene polymorphisms with essential hypertension, aldosterone level, and left ventricular structure. (PMID: 20660004)
HSD3B1	Estrogen synthesis genes CYP19A1, HSD3B1, and HSD3B2 in hypertensive disorders of pregnancy. (PMID: 22638611)
PGR	The promise of selective aldosterone receptor antagonists for the treatment of hypertension and congestive heart failure. (PMID: 10981173)
CHRM3	Inferred relationship with CHRM3 based on MalaCards. Urofacial Syndrome 1 Gene-disease relationship from DISEASES, HGMD. Symptoms: hypertension. Genome-wide association analyses suggest NELL1 influences adverse metabolic response to HCTZ in African Americans. (PMID: 23400010)
KCNH2	[Genetic predisposition to development of atrial fibrillation in patients with hypertensive disease]. (PMID: 20831043)
SCN5A	Alkaloids from Veratrum taliense Exert Cardiovascular Toxic Effects via Cardiac Sodium Channel Subtype 1.5. (PMID: 26729167)
HTR3A	[Evaluation of acute and chronic effects of ketanserin in the treatment of hypertension and hypothesis on a new mechanism of action]. (PMID: 2102130)
ADRA1B	Alpha- and beta-adrenergic receptor polymorphisms in hypertensive and normotensive offspring. (PMID: 16645408)
ADRA1D	[Association between ADRA1A gene polymorphism and autoantibodies against the alpha1-adrenergic receptor in hypertensive patients.]. (PMID: 19102884)
NCOA2	A novel point mutation in the ligand-binding domain (LBD) of the human glucocorticoid receptor (hGR) causing generalized glucocorticoid resistance: the importance of the C terminus of hGR LBD in conferring transactivational activity. (PMID: 15769988)
CHRM2	Hypotensive effect of an M2-selective muscarinic antagonist in anaesthetized guinea-pigs. (PMID: 7744887)
CHRNA2	Mecamylamine (Inversine): an old antihypertensive with new research directions. (PMID: 12080428)
OPRM1	Hypertensive state, independent of hypertrophy, exhibits an attenuated decrease in systolic function on cardiac kappa-opioid receptor stimulation.(PMID: 19181965)
BCL2	VEGFR-1, Bcl-2, and HO-1 Ratios in Pregnant Women With Hypertension. (PMID: 23925400)
BAX	Angiotensin II type 1 receptor-activated caspase-3...sympathoexcitation in stroke-prone spontaneously hypertensive rats. (PMID: 20065158)
CASP9	Hexane/ethanol extract of Glycyrrhiza uralensis licorice suppresses doxorubicin-induced apoptosis in H9c2 rat cardiac myoblasts. (PMID: 18849542)
CASP3	Upregulation of myocardial Annexin A5 in hypertensive heart disease: association with systolic dysfunction. (PMID: 17766279)
CASP8	[Effect of a complex treatment, including glutargin and erbisol on the blood plasma content of protein P53, apoptotic markers of type II, activity of caspases and the level of sCD 117 in patients with autonomic-vascular dystonia]. (PMID: 19145821)
PRKCA	Gene-Gene Interactions Among PRKCA, NOS3 and BDKRB2 Polymorphisms Affect the Antihypertensive Effects of Enalapril. (PMID: 27696692)
PON1	Roles of paraoxonase and oxidative stress in adolescents with uraemic, essential or obesity-induced hypertension. (PMID: 16912512)
MAP2	Neuroprotective effects of mesenchymal stem cells derived from human embryonic stem cells in transient focal cerebral ischemia in rats. (PMID: 19209181)
RELA	Expression patterns of RelA and c-mip are associated with different glomerular diseases following anti-VEGF therapy. (PMID: 24067439)
VEGFA	Association between bevacizumab-related hypertension and vascular endothelial growth factor (VEGF) gene... (PMID: 23161411)
FOS	The renin-angiotensin system and vascular hypertrophy. (PMID: 8837552)
CDKN1A	Indoxyl sulfate promotes vascular smooth muscle cell senescence with upregulation of p53, p21, and prelamin A through oxidative stress. (PMID: 22555846)
TNFSF15	Hits in diseases associated with TNFSF15 based on MalaCards. Primary Biliary Cholangitis Gene-disease relationship from Orphanet, GeneCards, HGMD. Symptoms: portal hypertension
IL6	Association of interleukin-6, interleukin-12, and interleukin-10 gene polymorphisms with essential hypertension in Tatars from Russia. (PMID: 18163209)
TP63	Inferred relationship with TP63 based on MalaCards. Urofacial Syndrome 1 Gene-disease relationship from DISEASES, HGMD. Symptoms: hypertension. Summaries:The urofacial syndrome (UFS) is a rare autosomal recessive...ascending bacterial infection leading to kidney damage, hypertension, and renal failure.
LDLR	Genetics of hypertension: what we know and don't know. (PMID: 2208756)
CAT	Beneficial effect of vitamin E supplementation on the...kinetic properties of Tamm-Horsfall glycoprotein in hypertensive and hyperoxaluric patients. (PMID: 15855216)
IGF1R	Study on insulin resistance and genetic polymorphisms in essential hypertension patients of two different kinds of TCM constitution. (PMID: 17898946)
STAT1	The mechanism of signal transduction during vascular...autoantibodies against angiotensin AT1 receptor from hypertension. (PMID: 18208665)
CYP3A4	Association of polymorphisms of ABCA1 and ROS1 with hypertension in Japanese individuals. (PMID: 18097620)
CAV1	Variants of the caveolin-1 gene: a translational investigation linking insulin resistance and hypertension. (PMID: 21613355)
ICAM1	Effect of interleukin 8 and ICAM-1 on calcium-dependent...of K+ in erythrocytes from subjects with essential hypertension. (PMID: 14741067)
MTTP	The environmental and genetic evidence for the association of hyperlipidemia and hypertension. (PMID: 19155782)
APOB	Association of an apolipoprotein B gene marker with essential hypertension. (PMID: 10205247)
VCAM1	C-reactive protein and intercellular adhesion molecule-1...oxidant stress than blood pressure in established hypertension. (PMID: 17211250)
SOD2	Genetic polymorphisms of oxidative and antioxidant enzymes and arsenic-related hypertension. (PMID: 16076760)
NOS3	Nitric oxide and coronary vascular endothelium adaptations in hypertension. (PMID: 20057900)
ECE1	Association of genetic polymorphisms of endothelin-converting enzyme-1 gene with hypertension in a Japanese population and rare missense mutation in preproendothelin-1 in Japanese hypertensives. (PMID: 17664854)
CPT1A	Haplotype analysis of carnitine transporters and left ventricular mass in human essential hypertension. (PMID: 15647998)
AHR	Roles of xenobiotic receptors in vascular pathophysiology. (PMID: 24859622)
RHOA	Increased level of p63RhoGEF and RhoA/Rho kinase activity in hypertensive patients. (PMID: 24356540)
MT2A	Identification of NPC2 protein as interaction molecule with C2 domain of human Nedd4L. (PMID: 19664597)
EP300	Tyrosine phosphorylation of RACK1 triggers cardiomyocyte hypertrophy by regulating the interaction between p300 and GATA4. (PMID: 27208796)
TFF1	Assessment of a polymorphism of SDK1 with hypertension in Japanese Individuals. (PMID: 19851296)
GH1	Genetic variation at the growth hormone (GH1) and growth...hormone receptor (GHR) loci as a risk factor for hypertension and stroke. (PMID: 16572267)
PPARGC1B	Inferred relationship with PPARGC1B based on MalaCards. Body Mass Index Quantitative Trait Locus 11 Gene-disease relationship from DISEASES, Novoseek. Symptoms: hypertension
GHR	Association of sixty-one non-synonymous polymorphisms in forty-one hypertension candidate genes with blood pressure variation and hypertension. (PMID: 17137217)
P4HB	Regulation of the CUL3 Ubiquitin Ligase by a Calcium-Dependent Co-adaptor. (PMID: 27716508)
CYP21A2	Prevalence and Clinical Outcome of CYP21A2 Gene Mutations in Patients with Nonfunctional Adrenal Incidentalomas. (PMID: 25970792)
RAD51	Function: HPO Related Terms. HP:0001638: A myocardial disorder in which the heart muscle is...abnormal, in the absence of coronary artery disease, hypertension, valvular disease and congenital heart disease sufficient to cause the observed myocardial abnormality. HP:0001639: Hypertrophic cardiomyopathy (HCM) is defined by the...thickness or mass in the absence of loading conditions (hypertension,…
F7	Hemostasis in normotensive and hypertensive men: results of the PROCAM study. The prospective cardiovascular Münster study. (PMID: 9794731)
KDR	Association of VEGF and VEGFR2 single nucleotide polymorphisms with hypertension and clinical outcome in metastatic clear cell renal cell carcinoma patients treated with sunitinib. (PMID: 21882181)
EGFR	Critical role of Rho-kinase and MEK/ERK pathways for angiotensin II-induced plasminogen activator inhibitor type-1 gene expression. (PMID: 11348889)
STAT3	Interleukin-6 deficiency attenuates angiotensin II-induced cardiac pathogenesis with increased myocyte hypertrophy. (PMID: 29079193)
AKT1	AKT participates in endothelial dysfunction in hypertension. (PMID: 15136501)
MMP9	Lercanidipine reduces matrix metalloproteinase-9 activity in patients with hypertension. (PMID: 16424795)
MAPK3	Endogenous and exogenous cardiac glycosides and their mechanisms of action. (PMID: 17610345)
MAPK1	Transactivation of epidermal growth factor receptor...experimental hyperleptinemia: role in leptin-induced hypertension. (PMID: 18282556)
MDM2	The MDM2 promoter T309G polymorphism was associated with preeclampsia susceptibility. (PMID: 28508227)
RASGRF2	Genome-wide association study of blood pressure response to methylphenidate treatment of attention-deficit/hyperactivity disorder. (PMID: 21130132)
RAF1	Role of sunitinib and sorafenib in the treatment of metastatic renal cell carcinoma. (PMID: 18192256)
TIMP1	Abnormalities of the extracellular degradation of collagen type I in essential hypertension. (PMID: 9714110)
HIF1A	Elevated Endothelial Hypoxia-Inducible Factor-1α Contributes to Glomerular Injury and Promotes Hypertensive Chronic Kidney Disease. (PMID: 25987665)
ERBB2	Transactivation of ErbB receptors by leptin in the cardiovascular system: mechanisms, consequences and target for therapy. (PMID: 23688012)
IL1B	A study of five human cytokine genes in human essential hypertension. (PMID: 12009575)
CCL2	Correlation and association between plasma platelet-...monocyte- and endothelial cell-derived microparticles in hypertensive patients with type 2 diabetes mellitus. (PMID: 19658004)
SELE	E-selectin gene polymorphisms are associated with essential hypertension: a case-control pilot study in a Chinese population. (PMID: 20796317)
FN1	Stretch-induced overproduction of fibronectin in mesangial cells is mediated by the activation of mitogen-activated protein kinase. (PMID: 10078562)
CXCL8	Effect of interleukin 8 and ICAM-1 on calcium-dependent...of K+ in erythrocytes from subjects with essential hypertension. (PMID: 14741067)
BIRC5	Survivin-induced abnormal ploidy contributes to cystic kidney and aneurysm formation. (PMID: 24235270)
HMGCR	Novel concepts of statin therapy for cardiovascular risk reduction in hypertension. (PMID: 16729872)
BTK	Inferred relationship with BTK based on MalaCards. Williams-Beuren Syndrome Gene-disease relationship from DISEASES, GeneCards, Novoseek. Symptoms: hypertension
GFAP	Plasma growth factor activity and cardiac wall thickness. (PMID: 8326295)
UGT1A1	UDP-glucuronosyltransferase 1A1 is the principal enzyme responsible for puerarin metabolism in human liver microsomes. (PMID: 22648071)
CHEK2	The association of cell cycle checkpoint 2 variants and kidney function: findings of the Family Blood Pressure Program and the Atherosclerosis Risk In Communities study. (PMID: 19265784)
PPARA	Beneficial and deleterious effects of rosiglitazone on hypertension development in spontaneously hypertensive rats. (PMID: 15363815)
ATM	Influence of angiotensin II type 1 receptor polymorphism on hypertension in patients with hypercholesterolemia. (PMID: 11165203)
INS	Insulin hypersecretion: a distinctive feature between essential and secondary hypertension. (PMID: 1435300)
AKR1B1	Aldose reductase C-106T polymorphism is associated with the risk of essential hypertension. (PMID: 27343777)
KLK3	Prostate-specific antigen levels in hypertensive patients suffering from a non-ST elevation myocardial infarction or a new-onset atrial fibrillation. (PMID: 21333366)
MAP2K5	WNK1 activates ERK5 by an MEKK2/3-dependent mechanism. (PMID: 14681216)
APOA1	Hyperhomocysteinemia, lipid and lipoprotein disturbances in patients with primary hypertension. (PMID: 24797978)
CFTR	Blood pressure and the cystic fibrosis gene: evidence for lower pressure rises with age in female carriers. (PMID: 15477385)
NCOR1	A dominant negative human peroxisome proliferator-activated receptor (PPAR){alpha} is a constitutive transcriptional corepressor and inhibits signaling through all PPAR isoforms. (PMID: 15661858)
GCKR	Common genetic variation near melatonin receptor MTNR1B contributes to raised plasma glucose and increased risk of type 2 diabetes among Indian Asians and European Caucasians. (PMID: 19651812)
KCNJ11	[Association of the polymorphic marker Glu23Lys in the KCNJ11 gene with hypertension in Kyrgyz patients]. (PMID: 28252621)
CYP24A1	Genetic variation in CYP27B1 is associated with congestive heart failure in patients with hypertension. (PMID: 19891555)
PTGER2	Association between prostaglandin E2 receptor gene and essential hypertension. (PMID: 17644362)
PTGFR	Rare SNP rs12731181 in the miR-590-3p Target Site of...Prostaglandin F2α Receptor Gene Confers Risk for Essential Hypertension in the Han Chinese Population. (PMID: 25977569)
GLB1	Function:HPO Related Terms. HP:0001644: Dilated cardiomyopathy (DCM) is defined by the presence...dysfunction in the absence of abnormal loading conditions (hypertension, valve disease) or coronary artery disease sufficient. HP:0001638: A myocardial disorder in which the heart muscle is...abnormal, in the absence of coronary artery disease, hypertension, valvular disease and congenital heart dise…
SYK	Spleen tyrosine kinase inhibitors for rheumatoid arthritis: where are we now? (PMID: 24610702)
NCF1	Williams syndrome predisposes to vascular stiffness modified by antihypertensive use and copy number changes in NCF1. (PMID: 24126171)
LTA4H	Contribution of molecular modeling and site-directed mutagenesis to the identification of a new residue, glutamate 215, involved in the exopeptidase specificity of aminopeptidase A. (PMID: 14674752)
NFKBIA	Alpha1-adrenergic receptor antagonists: novel therapy for pituitary adenomas. (PMID: 16020484)
TYR	Inferred relationship with TYR based on MalaCards. Homocystinuria Due to Cystathionine Beta-Synthase Deficiency Gene-disease relationship from GeneCards, HGMD. Symptoms: hypertension
NCOA1	Variation in estrogen-related genes and cross-sectional and longitudinal blood pressure in the Framingham Heart Study. (PMID: 16269961)
MMP2	Serum Concentrations of Endothelin-1 and Matrix Metalloproteinases-2, -9 in Pre-Hypertensive and Hypertensive Patients with Type 2 Diabetes. (PMID: 27490532)
SOD1	Anti-oxidant status and lipid peroxidation in patients with essential hypertension. (PMID: 9746113)
TIMP2	Downregulation of vascular matrix metalloproteinase inducer and activator proteins in hypertensive patients. (PMID: 15363819)
FAS	Fas/Fas-Ligand pathway is impaired in patients with type 2 diabetes. Influence of hypertension and insulin resistance. (PMID: 15803113)
MAPK9	Inferred relationship with MAPK9 based on MalaCards:Pheochromocytoma Gene-disease relationship from DISEASES, GeneCards, Novoseek. Symptoms: episodic hypertension hypertensive retinopathy. Summaries:Pheochromocytoma: A catecholamine-producing tumor of...increased secretion of epinephrine and norepinephrine, is hypertension, which may be persistent or intermittent.
PLAT	[The influence of I/D polymorphism of the angiotensin...the haemostatic system in patients with essential hypertension and dyslipidemia]. (PMID: 16496609)
GSTP1	Genetic variation in glutathione S-transferase genes...cerebral stroke in patients suffering from essential hypertension. (PMID: 22528457)
SELP	Progressive vascular damage in hypertension is associated with increased levels of circulating P-selectin. (PMID: 9533416)
AGTR1	Polymorphisms of angiotensin-converting enzyme and...angiotensin II receptor type 1 genes in essential hypertension in a Polish population. (PMID: 11687736)
PDGFA	Protective role of a novel erythrocyte-derived depressing factor on blood vessels of renovascular hypertensive rats. (PMID: 17439406)
ACE2	ACE2 gene polymorphism and essential hypertension: an updated meta-analysis involving 11,051 subjects. (PMID: 22297693)
GPT	Effects of eprosartan on serum metabolic parameters in patients with essential hypertension. (PMID: 18949087)
JAK3	Prevention of organ allograft rejection by a specific Janus kinase 3 inhibitor. (PMID: 14593182)
CDKN1B	Nebivolol inhibits human aortic smooth muscle cell growth: effects on cell cycle regulatory proteins. (PMID: 10836716)
LEPR	Association of four insulin resistance genes with type 2 diabetes mellitus and hypertension in the Chinese Han population. (PMID: 24414038)
PLIN2	Inferred relationship with PLIN2 based on MalaCards:Body Mass Index Quantitative Trait Locus 11 Gene-disease relationship from DISEASES, Novoseek. Symptoms: hypertension
F2R	Vascular thrombin receptor regulation in hypertensive rats. (PMID: 9168786)
MAOA	[Study on molecular mechanism of ganyang shangkang syndrome in hypertension]. (PMID: 11783321)
ALDH2	Genetic analysis of 22 candidate genes for hypertension in the Japanese population. (PMID: 15167446)
